# Supplementary material for: Chronically high level of tgfb1a induction causes both hepatocellular carcinoma and cholangiocarcinoma via a dominant Erk pathway in zebrafish
Source: PubMed Central journal article supplement (PMC5652767; doi:10.18632/oncotarget.20357), 2017-08-18
Supplement: oncotarget-08-77096-s001.pdf [file oncotarget-08-77096-s001.pdf]

## Chronically high level of *tgfb1a* induction causes both hepatocellular carcinoma and cholangiocarcinoma via a dominant Erk pathway in zebrafish

### SUPPLEMENTARY MATERIALS

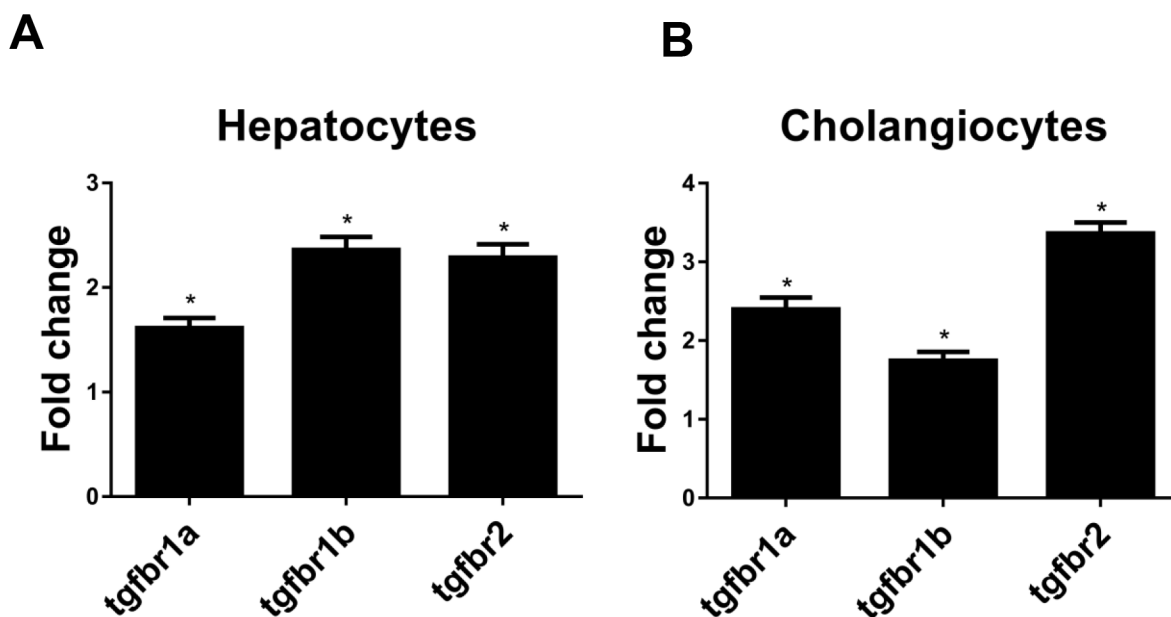

**Supplementary Figure 1: Analysis of inflammation gene expressions in hepatocytes and cholangiocytes in *tgfb1a*+ zebrafish.** 3-month-old *tgfb1a*+ zebrafish were treated with either 0  $\mu$ M (control) or 3  $\mu$ M (high) mifepristone for 6 weeks. Liver were dissociated and FACS sorted for hepatocytes and cholangiocytes and inflammation gene expression was analysed by RT-qPCR. (A) Expression of *tgfb1a*, *tgfb1b* and *tgfb2* in hepatocytes of *tgfb1a*+ zebrafish. (B) Expression of *tgfb1a*, *tgfb1b* and *tgfb2* in cholangiocytes of *tgfb1a*+ zebrafish. \* $p < 0.05$ .

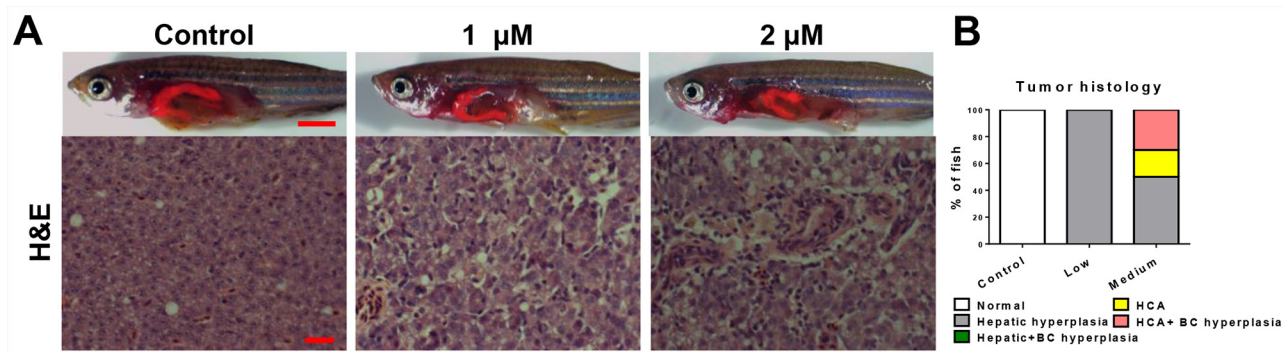

**Supplementary Figure 2: Gross morphology and histology of *tgfb1a*+ zebrafish induced for 9 weeks by 1  $\mu$ M or 2  $\mu$ M of mifepristone.** (A) Gross morphology (top row) and histology as stained by H&E (bottom row). Scale bar, 100  $\mu$ m for the top row and 20  $\mu$ m for the bottom row. (B) Quantification of tumor phenotypes in these *tgfb1a*+ zebrafish (n=20/group).

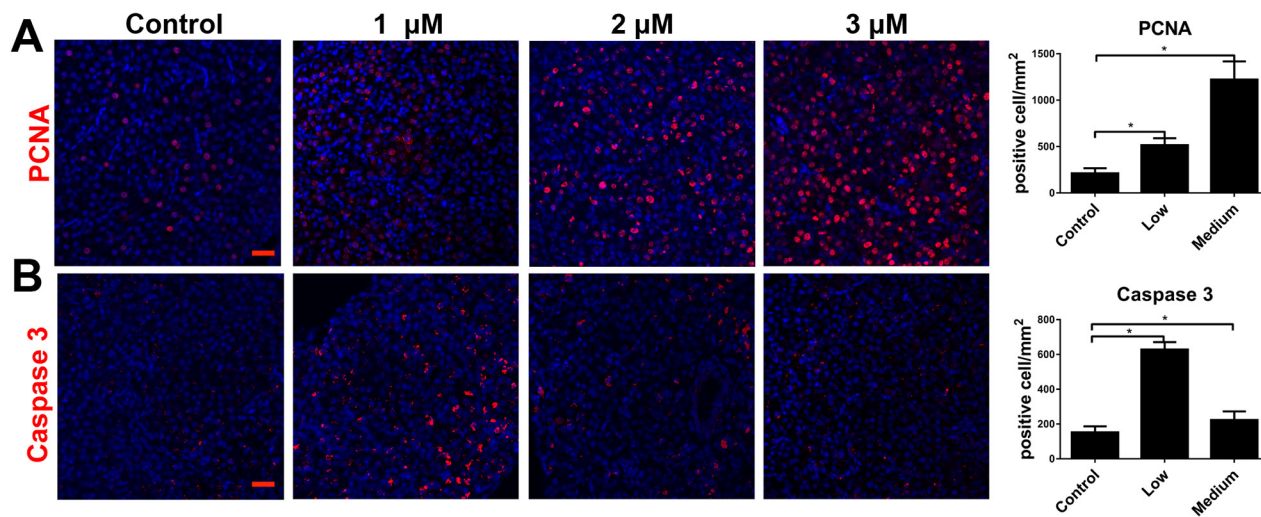

**Supplementary Figure 3: Proliferation and apoptosis of liver cells in *tgfb1a*+ zebrafish induced for 6 weeks by 1  $\mu$ M, 2  $\mu$ M and 3  $\mu$ M mifepristone. (A) PCNA staining (left) and quantification (right) for cell proliferation (n=20/group). (B) Caspase3 staining (left) and quantification (right) for cell apoptosis (n=20/group). Scale bars, 20  $\mu$ m. Statistical significance, \*p<0.05.**

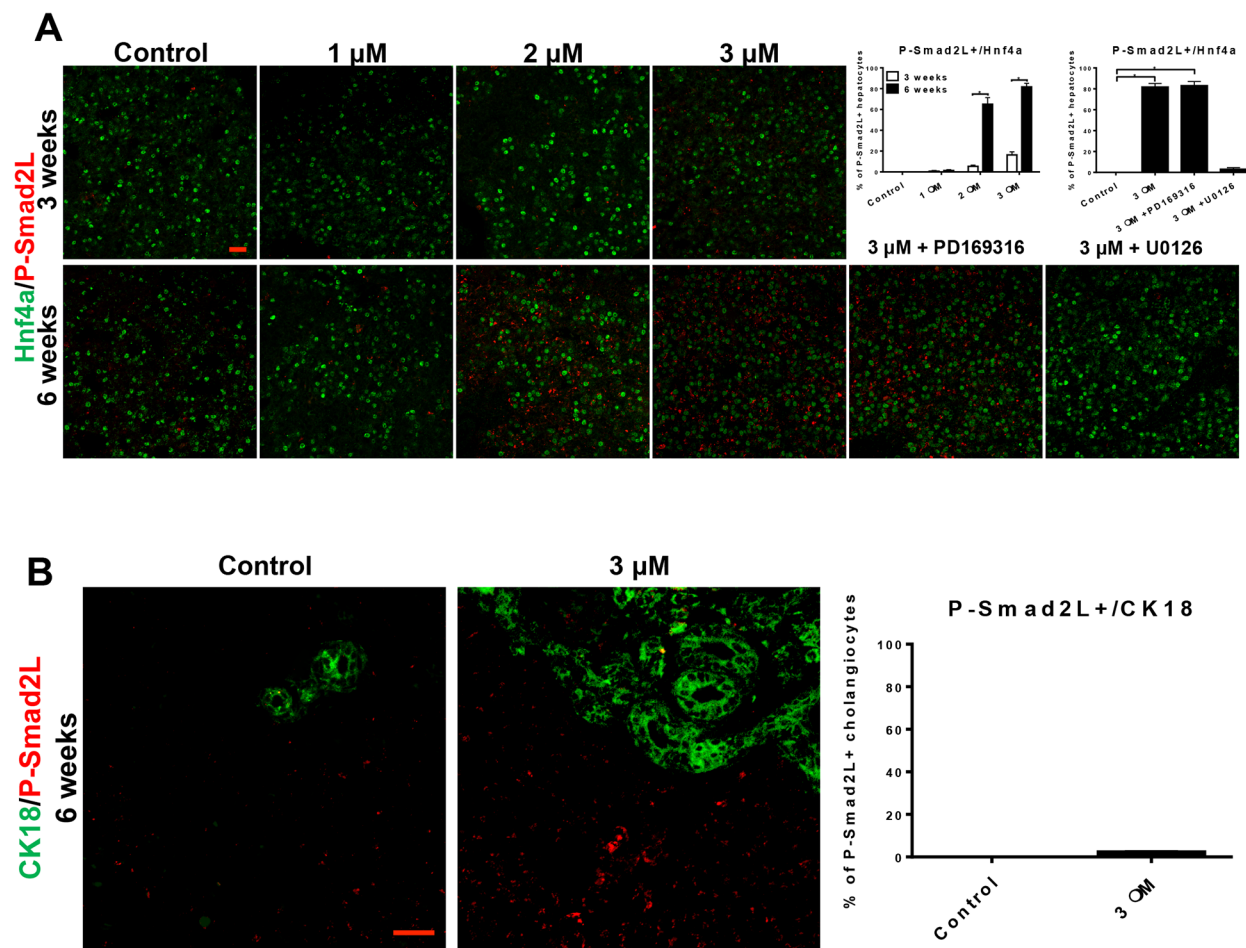

**Supplementary Figure 4: Expression of P-Smad2L in hepatocyte and cholangiocytes respectively.** 3-month-old *tgfb1a*+ transgenic zebrafish were treated with 1  $\mu$ M (low), 2  $\mu$ M (medium) and 3  $\mu$ M (high) mifepristone for 6 weeks or induced with 3  $\mu$ M of mifepristone for 3 weeks, then co-incubated with 3  $\mu$ M of mifepristone + 1  $\mu$ M of either PD169316 (Smad2 inhibitor) or U0126 (MEK inhibitor) for another 3 weeks. (A) Immunofluorescent co-staining of Hnf4a/P-Smad2L. (B) Immunofluorescent co-staining of CK18/P-Smad2L. n=20/group. Scale bars, 20  $\mu$ m. Statistical significance, \*p<0.05.

**Supplementary Table 1 : List of PCR primers**

| Gene           | Forward               | Reverse              |
|----------------|-----------------------|----------------------|
| <i>b actin</i> | CTCTGGGTCACCGCTTCTTT  | CAGATGCTCACGAAACCCCT |
| <i>Cebpa</i>   | TGAAGATTGGCGATCGAGGG  | ATTTTCGCCTTGTCCCGACT |
| <i>illb</i>    | GCCTGTGTGTTTGGGAATCT  | TGATAAACCAACCGGGACAT |
| <i>mCherry</i> | GAACGGCCACGAGTTCGAGA  | CTTGGAGCCGTACATGAAC  |
| <i>nfkB2</i>   | AACAAGACGCAAGGAGCCCA  | TGAACCTCCACACGAGCATT |
| <i>Pparg</i>   | CACTCTCCGCTGATATGGTGG | GTAGATGGGCTCGTGTGTCC |
| <i>srebpl</i>  | CTCTGGGTCACCGCTTCTTT  | CAGATGCTCACGAAACCCCT |
| <i>Tnfa</i>    | CGTCTGCTTCACGCTCCATA  | GATGTGCAAAGACACCTGGC |

Supplementary Table 2 : List of antibodies

| Primary antibody against         | Host species | Dilution | Supplier                       |
|----------------------------------|--------------|----------|--------------------------------|
| Alcam                            | Mouse        | 1:5      | zn-8, ZIRC                     |
| Alexa Fluor 488 donkey anti-goat | Goat         | 1:500    | A11055, ThermoFisher           |
| Alexa Fluor 546 goat anti-rabbit | Rabbit       | 1:500    | A11071, ThermoFisher           |
| Alexa Fluor 488 goat anti-rabbit | Rabbit       | 1:500    | A11070, ThermoFisher           |
| Alexa Fluor 546 goat anti-mouse  | Mouse        | 1:500    | A11018, ThermoFisher           |
| Alexa Fluor 488 goat anti-mouse  | Mouse        | 1:500    | A11017, ThermoFisher           |
| aSma                             | Rabbit       | 1:200    | ab15734, Abcam                 |
| Bcatenin                         | Rabbit       | 1:100    | ab6302, Abcam                  |
| Caspase 3(Active)                | Rabbit       | 1:200    | C92-065, BD biosciences        |
| CD4                              | Rabbit       | 1:100    | AS-55712, Anaspec              |
| Collagen I                       | Rabbit       | 1:100    | ab23730 Abcam                  |
| Csflr                            | Rabbit       | 1:100    | AS-55618, Anaspec              |
| Cytokeratin 18                   | Mouse        | 1:100    | LS-C84878, LifeSpan bioscience |
| Ecadherin                        | Mouse        | 1:100    | ab11512, Abcam                 |
| HNF4a                            | Goat         | 1:50     | SC-6556, Santa Cruz            |
| Laminin                          | Rabbit       | 1:100    | L9393, Sigma                   |
| Leptin                           | Rabbit       | 1:100    | Ab1673, Merck                  |
| mCherry                          | Rabbit       | 1:100    | ab167453, Abcam                |
| Nfkb2                            | Rabbit       | 1:100    | AS-55484, Anaspec              |
| PCNA                             | Rabbit       | 1:200    | FL-261, Santa Cruz             |
| P-Erk                            | Mouse        | 1:100    | M9692, Sigma                   |
| P-Erk                            | Rabbit       | 1:200    | SC-13073, Santa Cruz           |
| P-Smad2 (Ser467)                 | Mouse        | 1:100    | ab53100, Abcam                 |
| P-Smad2 (Ser465/467)             | Rabbit       | 1:100    | 3101, Cell Signaling           |
| P-Smad2L (Ser245/250/255)        | Rabbit       | 1:100    | 3104, Cell Signaling           |
| Tgfb1                            | Rabbit       | 1:200    | AS55450, Anaspec               |
| TGFB1                            | Rabbit       | 1:100    | ab92486, Abcam                 |
| Vimentin                         | Mouse        | 1:100    | ab8979, Abcam                  |
